# Supplementary material for: Comparison of mHTT Antibodies in Huntington’s Disease Mouse Models Reveal Specific Binding Profiles and Steady-State Ubiquitin Levels with Disease Development
Source: PLoS One. 2016 May 19;11(5):e0155834. doi: 10.1371/journal.pone.0155834 (PMC4873140; doi:10.1371/journal.pone.0155834)
Supplement: S1 File — (XLSX) [file pone.0155834.s001.xlsx]

## Sheet: Q92
Hdh Q92
s830 with CA treatment
Q92																					8m	total affected neurones
TOTAL AFFECTED NEURONS IN Q92													AVERAGE	STDEV	STANDARD EROR OF MEAN								S830-CA	S830	MW8	Ubiquitin	EM48	1C2
8 months	512441	459149	439116	471643								8M	470587	30952.2	15476.1							Ave	470587	108920	277823	204037	487886	153323
18 months	989479	619105	617111	651853	743348							18M	724179	156913	70173.6
																						sem	15476.1	43639.3	48395.1	49614.9	14714.4	50856.3
Diffuse Staining
8 months	397583	267466	330517	304603								8M	325042	54848.4	27424.2
18 months	99855.7	109254	33748.2	80300.7	68828.5							18M	78397.4	29585.9	13231.2
inclucions
8 months	114857	191684	108599	167040								8M	145545	40404.6	20202.3
18 months	889623	509851	549614	571552	674519							18M	639032	152719	68297.9
																					8m	Diffuse Staining
																							S830-CA	S830	MW8	Ubiquitin	EM48	1C2
																						Ave	325042	108920	277823	204037	487886	153323
																						sem	27424.2	43639.3	48395.1	49614.9	14714.4	50856.3
MW8
TOTAL AFFECTED NEURONS Q92													AVERAGE	STDEV	STANDARD EROR OF MEAN
8M	379858	207465	347744	123510	330538							8M	277823	108215	48395.1
18M	539908	539356	271820	365343	142870	361063						18M	370060	154194	62949.5
Diffuse Staining
8M	379858	207465	347744	123510	330538							8M	277823	108215	48395.1
18M	0	0	0	0	0	0						18M	0	0	0
inclucions
8M	0	0	0	0	0							8M	0	0	0
18M	539908	539356	271820	365343	142870	361063						18M	370060	154194	62949.5						8m	Inclusions
																							S830-CA	S830	MW8	Ubiquitin	EM48	1C2
																						Ave	145545	0	0	0	0	0
																						sem	20202.3	0	0	0	0	0
UBIQUITIN
TOTAL AFFECTED NEURONS IN Q92													AVERAGE	STDEV	STANDARD EROR OF MEAN
8M	395222	168222	105967	183728	167047							8M	204037	110942	49614.9
18M	382426	279660	293850	138995	159770	157743						18M	235407	98016.7	40015.2
Diffuse Staining
8M	395222	168222	105967	183728	167047							8M	204037	110942	55471.1
18M	0	0	0	0	0	0						18M	0	0	0
inclucions
8M	0	0	0	0	0							8M	0	0	0
18M	382426	279660	293850	138995	159770	157743						18M	235407	98016.7	40015.2
																					18m	total affected neurones
																							S830-CA	S830	MW8	Ubiquitin	EM48	1C2
																						Ave	724179	370060	370060	235407	411493	299919
																						sem	70173.6	62949.5	62949.5	40015.2	43713.1	53161.9
EM48
TOTAL AFFECTED NEURONS IN Q92													AVERAGE	STDEV	STANDARD EROR OF MEAN
8M	452096	463710	521027	478862	523735							8M	487886	32902.5	14714.4
18M	573652	351800	251059	449853	426926	415666						18M	411493	107075	43713.1
Diffuse Staining
8M	452096	463710	521027	478862	523735							8M	487886	32902.5	14714.4
18M	0	0	0	0	0							18M	0	0	0
inclucions
8M	0	0	0	0	0							8M	0	0	0
18M	573652	351800	251059	449853	426926	415666						18M	411493	107075	43713.1
1C2																					18m	Diffuse Staining
TOTAL AFFECTED NEURONS IN Q92													AVERAGE	STDEV	STANDARD EROR OF MEAN								S830-CA	S830	MW8	Ubiquitin	EM48	1C2
8M	180248	104665	106953	335978	38773.4							8M	153323	113718	50856.3							Ave	78397.4	121411	0	0	0	0
18M	361179	176212	466708	413394	165392	216633						18M	299919	130219	53161.9
																						sem	13231.2	15457.6	0	0	0	0
Diffuse Staining
8M	180248	104665	106953	335978	38773.4							8M	153323	113718	50856.3
18M	0	0	0	0	0	0						18M	0	0	0
inclucions
8M	0	0	0	0	0							8M	0	0	0
18M	361179	176212	466708	413394	165392	216633						18M	299919	130219	53161.9
																					18m	Inclusions
																							S830-CA	S830	MW8	Ubiquitin	EM48	1C2
																						Ave	639032	274511	370060	235407	411493	299919
																						sem	68297.9	46624.8	62949.5	40015.2	43713.1	53161.9

## Sheet: R6-1
R6/1
S830 with Citric acid treatment
R6/1
	Total Neurones												AVERAGE	STDEV	STANDARD EROR OF MEAN					363371	661286	142140	577754	0
4 months	666179	740998	1.17394e+06	584365	701090							4M	773314	231268	103426					454999	687378	132581	680210	0		4m	total affected neurones
7 months	594967	549856	637244	513423	573269							7M	573752	46615.6	20847.1					1.00489e+06	387910	264210	467940	0				S830-CA	S830	MW8	Ubiquitin	EM48	1C2
																				476842	480409	238543	555365	0			Ave	773314	104463	524286	221433	600399	204951
	agg																			562717	404448		720727	0
4 months	302809	285999	169047	107523	138373							4M	200750	88417.5	39541.5												sem	103426	16532.8	63345.4	51766.1	45240.9	35058.9
7 months	249174	65794.7	37211.3	80816.6	242358							7M	135071	102285	45743.4
																				345793	480468	152488	638384	74760.4
																				484061	570591	238725	798428	92754.6
	inc																			600032	513210	200516	888206	140854
4 months	363371	454999	1.00489e+06	476842	562717							4M	572564	251868	112639					432607	487124	156246	771555	70974.3
7 months	345793	484061	600032	432607	330911							7M	438681	109969	49179.8					330911	600372	190152	642137	118381
S830
TOTAL AFFECTED NEURONS IN R6/1													AVERAGE	STDEV	STANDARD EROR OF MEAN
4 Months	132019	144241	60480.7	71363.8	114212							4 Months	104463	36968.5	16532.8
7 Months	27618.9	147699	59129.9	45879.3	45584.3							7 Months	65182.3	47469.4	21229
Diffuse Staining
4 Months	36419.2	54090.3	25920.3	35681.9	45684.9							4 Months	39559.3	10719	4793.69
7 Months	0	0	0	0	0							7 Months	0	0	0
inclucions																										4m	Diffuse Staining
4 Months	95600.3	90150.5	34560.4	35681.9	68527.3							4 Months	64904.1	29014.8	12975.8													S830-CA	S830	MW8	Ubiquitin	EM48	1C2
7 Months	27618.9	147699	59129.9	45879.3	45584.3							7 Months	65182.3	47469.4	21229												Ave	200750	39559.3	0	53715.5	0	204951
																											sem	39541.5	4793.69	0	8922.12	0	35058.9
MW8
TOTAL AFFECTED NEURONS IN R6/1													AVERAGE	STDEV	STANDARD EROR OF MEAN
4M	661286	687378	387910	480409	404448							4M	524286	141645	63345.4
7M	480468	570591	513210	487124	600372							7M	530353	52851.2	23635.8
Diffuse Staining
4M	0	0	0	0	0							4M	0	0	0
7M	0	0	0	0	0							7M	0	0	0
inclucions
4M	661286	687378	387910	480409	404448							4M	524286	141645	63345.4
7M	480468	570591	513210	487124	600372							7M	530353	52851.2	23635.8
																										4m	Inclusions
																												S830-CA	S830	MW8	Ubiquitin	EM48	1C2
UBIQUITIN																											Ave	572564	64904.1	524286	194369	600399	0
TOTAL AFFECTED NEURONS IN R6/1													AVERAGE	STDEV	STANDARD EROR OF MEAN
4M	79953.7	212129	315347	278301								4M	221433	103532	51766.1												sem	112639	12975.8	63345.4	33385.1	45240.9	0
7M	272872	341036	246088	208328	214954							7M	256656	53780.2	24051.2
Diffuse Staining
4M	44418.7	79548.5	51137.4	39757.2								4M	53715.5	17844.2	8922.12
7M	112359	102311	45571.8	52081.9	24802.4							7M	67425.2	37966.3	18983.1
inclucions
4M	142140	132581	264210	238543								4M	194369	66770.3	33385.1
7M	152488	238725	200516	156246	190152							7M	187625	35366.2	15816.2
EM48
TOTAL AFFECTED NEURONS IN R6/1													AVERAGE	STDEV	STANDARD EROR OF MEAN
4M	577754	680210	467940	555365	720727							4M	600399	101162	45240.9
7M	638384	798428	888206	771555	642137							7M	747742	107212	47946.8											7m	total affected neurones
																												S830-CA	S830	MW8	Ubiquitin	EM48	1C2
																											Ave	573752	65182.3	530353	256656	747742	99544.8
Diffuse Staining
4M	0	0	0	0	0							4M	0	0	0												sem	20847.1	21229	23635.8	24051.2	47946.8	12141.3
7M	0	0	0	0	0							7M	0	0	0
inclucions
4M	577754	680210	467940	555365	720727							4M	600399	101162	45240.9
7M	638384	798428	888206	771555	642137							7M	747742	107212	47946.8
1C2
TOTAL AFFECTED NEURONS IN R6/1													AVERAGE	STDEV	STANDARD EROR OF MEAN
4M	181380	136584	152262	221956	332574							4M	204951	78394.1	35058.9
7M	74760.4	92754.6	140854	70974.3	118381							7M	99544.8	29740	12141.3
Diffuse Staining																										7m	Diffuse Staining
4M	181380	136584	152262	221956	332574							4M	204951	78394.1	35058.9													S830-CA	S830	MW8	Ubiquitin	EM48	1C2
7M	0	0	0	0	0							7M	0	0	0												Ave	135071	0	0	67425.2	0	0
																											sem	45743.4	0	0	18983.1	0	0
inclucions
4M	0	0	0	0	0							4M	0	0	0
7M	74760.4	92754.6	140854	70974.3	118381							7M	99544.8	29740	12141.3
																										7m	Inclusions
																												S830-CA	S830	MW8	Ubiquitin	EM48	1C2
																											Ave	438681	65182.3	530353	187625	747742	99544.8
																											sem	49179.8	21229	23635.8	15816.2	47946.8	12141.3

## Sheet: CV8M+18M
YAC128														AVERAGE	STDEV
8m-car	708624	626726	791821	688231	697914									702663	59122.6	26440.4
8m-wt	845832	952254	755872											851319	98305.8	56756.9
18m-car	601760	682073	596460	756269	584156									644144	73619.6	32923.7
														#DIV/0!	#DIV/0!	#DIV/0!
oldQ150
8M-HOM-CV	558393	505236												531815	37587.8	26578.6
8M-WT-CV	593174	739599	613521											648765	79320.1	45795.5
18M-HOM-CV	606462	337207	434737	321031	517993	477623	348677							434818	106543	40269.3
18M-WT-CV	455825	326780	280276	478986	589207	583661	587865	496994						474949	118528	41906.1
NewQ150
9M-WT	524414	580746	502769	502171	515872									525194	32428.7	14502.5
9M-HOM	645346	475250	453544	470047										511047	90009.7	45004.9
17M-WT	433855	448705	487056	424161	478353									454426	27427.9	12266.1
17M-HOM	348620	425724	431142	421303	458574	406505	422794	405820	418107	394266	438980	352894		410394	32410.1	9355.99
Q92
8M-CV-HOM	298949	531651												415300	164545	116351
8M-CV-WT	892985	352791												622888	381975	270097
18M-CV-HOM	453325	441006	319963											404765	73698.1	42549.6
18M-CV-WT	610606	732255	448182											597014	142523	82285.9
R6/1
4M-WT		587747	673253	654373	642032	657070								642895	32773.3	14656.7
4M-CAR		533178	603685	468979	486427	568527								532159	55952.3	25022.6
7M-WT		547778	583723	606767	746196	630623								623017	75332.6	33689.8
7M-CAR		497214	326804	524651	562490	490879								480407	90389.7	40423.5

## Sheet: YAC128
YAC128
s830 with CA treatment																				8m	total affected neurones
yac128																						S830-CA	S830	MW8	Ubiquitin	EM48	1C2
	Total Neurones											AVERAGE	STDEV	STANDARD EROR OF MEAN							Ave	417341	0	200706	463591	188578	156605
8 months	353069	420939	422859	347999	541840						8M	417341	78234.3	34987.4
18 months	554006	717686	490544	365199	395670						18M	504621	140839	62985.2							sem	34987.4	0	26951.8	34448.2	22364.1	29911.9
	Agg
8 months	353069	420939	422859	347999	541840						8M	417341	78234.3	34987.4
18 months	262918	276698	182202	101701	176888						18M	200081	71335.4	31902.1
	inc
8 months	0	0	0	0	0						8M	0	0	0
18 months	291088	440988	308342	263498	218782						18M	304540	83445.1	37317.8
																				8m	Diffuse Staining
																						S830-CA	S830	MW8	Ubiquitin	EM48	1C2
																					Ave	417341	0	169280	463591	188578	156605
																					sem	34987.4	0	41944.8	34448.2	22364.1	29911.9
MW8
TOTAL AFFECTED NEURONS YAC128													AVERAGE	STDEV	STANDARD EROR OF MEAN
8M	215854	106203	195715	272759	212999							8M	200706	60266	26951.8
18M	491909	427515	1.19947e+06	440537	447279	274840						18M	546925	328141	133963
Diffuse Staining
8M	199250	16338.9	179405	272759	178644							8M	169280	93791.4	41944.8
18M	0	0	0	0	0	0						18M	0	0	0
inclucions
8M	16604.2	19504.6	16309.6	0	34354.7							8M	17354.6	12211.3	5461.05
18M	491909	427515	1.19947e+06	440537	447279	274840						18M	546925	328141	133963					8m	Inclusions
																						S830-CA	S830	MW8	Ubiquitin	EM48	1C2
																					Ave	0	0	17354.6	0	0	0
																					sem	0	0	5461.05	0	0	0
UBIQUITIN
TOTAL AFFECTED NEURONS YAC128													AVERAGE	STDEV	STANDARD EROR OF MEAN
8M	409106	419553	405757	582125	501414							8M	463591	77028.6	34448.2
18M	629359	417909	567061	510885	408960	575664						18M	518307	89544.2	36556.3
Diffuse Staining
8M	409106	419553	405757	582125	501414							8M	463591	77028.6	34448.2
18M	629359	275440	357685	327286	251668	360864						18M	367050	135808	55443.2
inclucions
8M	0	0	0	0	0							8M	0	0	0
18M	0	142469	209376	183599	157292	214800						18M	151256	79314.5	32380
EM48
TOTAL AFFECTED NEURONS YAC128													AVERAGE	STDEV	STANDARD EROR OF MEAN
8M	199465	144522	164042	164154	270707							8M	188578	50007.7	22364.1
18M	413312	365354	421410	350480	541993	374975	212400					18M	382846	98497.4	37228.5
																				18m	total affected neurones
																						S830-CA	S830	MW8	Ubiquitin	EM48	1C2
Diffuse Staining																					Ave	504621	434730	546925	518307	382846	365616
8M	199465	144522	164042	164154	270707							8M	188578	50007.7	22364.1
18M	0	0	0	0	0							18M	0	0	0						sem	62985.2	8277.26	133963	36556.3	37228.5	57136.5
inclucions
8M	0	0	0	0	0							8M	0	0	0
18M	413312	365354	421410	350480	541993	374975	212400					18M	382846	98497.4	37228.5
1C2
TOTAL AFFECTED NEURONS YAC128													AVERAGE	STDEV	STANDARD EROR OF MEAN
8M	136940	68637.8	249268	140949	187232							8M	156605	66885.1	29911.9
18M	574820	189695	380852	448912	368194	450391	146450					18M	365616	151169	57136.5
Diffuse Staining
8M	136940	68637.8	249268	140949	187232							8M	156605	66885.1	29911.9
18M	431115	148457	325118	360733	321191	189164	103376					18M	268451	121726	46008					18m	Diffuse Staining
																						S830-CA	S830	MW8	Ubiquitin	EM48	1C2
																					Ave	200081	243819	0	367050	0	268451
inclucions
8M	0	0	0	0	0							8M	0	0	0						sem	31902.1	5372.45	0	55443.2	0	46008
18M	143705	41238	55734.4	88179.2	47003.5	261227	43073.4					18M	97165.8	81085.8	30647.6
																				18m	Inclusions
																						S830-CA	S830	MW8	Ubiquitin	EM48	1C2
																					Ave	304540	190911	546925	151256	382846	97165.8
																					sem	37317.8	2904.82	133963	32380	37228.5	30647.6

## Sheet: oldQ150
B6X129 Hdh Q150				(OLD COLONY Q150
s830 with CA treatment																									8m	total affected neurones
OLD COLONY Q150																			S830	1C2	EM48	MW8	Ubiquitin				S830-CA	S830	MW8	Ubiquitin	EM48	1C2
	Total Neurones											AVERAGE	STDEV	STANDARD EROR OF MEAN					301415			384960				Ave	463661	182390	395502	402699	0	316529
8 months	525192	464576	401216								8M	463661	61993.4	35791.9					330472			189387
18 months	480726	648698	702921	492996	579764						18M	581021	96500	43156.1					177811			146511				sem	35791.9	41758.8	80382.2	65844.6	0	81570
																						173809
	AGG																					110382
8 months	223778	134104	223404								8M	193762	51665.3	25832.7
18 months	0	0	0	0	0						18M	0	0	0
	INCLU
8 months	301415	330472	177811								8M	269899	81063	46801.7
18 months	480726	648698	702921	492996	579764						18M	581021	96500	43156.1
S830
	Total Neurones											AVERAGE	STDEV	STANDARD EROR OF MEAN
8 months	262289	216570	183944	66756.8							8M	182390	83517.6	41758.8
18 months	293895	637642	559266	595633							18M	521609	155150	77575.1
	Agg
8 months	149233	150273	99969.4	58412.2							8M	114472	44132.7	22066.3
18 months	0	0	0	0	0						18M	0	0	0
																									8m	Diffuse Staining
	inc																										S830-CA	S830	MW8	Ubiquitin	EM48	1C2
8 months	113056	66296.8	83974.3	8344.6							8M	67917.8	44146.8	22073.4												Ave	193762	114472	198014	0	0	0
18 months	293895	637642	559266	595633							18M	521609	155150	77575.1
																										sem	25832.7	22066.3	66316.1	0	0	0
MW8
TOTAL AFFECTED NEURONS OLD COLONY Q150													AVERAGE	STDEV	STANDARD EROR OF MEAN
8M	507021	606038	268603	434523	161327							8M	395502	179740	80382.2
18M	843819	202826	749288	437509	614458							18M	569580	255669	114339
Diffuse Staining
8M	122061	426121	130232	260714	50945.4							8M	198014	148287	66316.1
18M	0	0	0	0	0							18M	0	0	0
inclucions
8M	384960	189387	146511	173809	110382							8M	201010	107117	47904.3
18M	843819	202826	749288	437509	614458							18M	569580	255669	114339
																									8m	Inclusions
																											S830-CA	S830	MW8	Ubiquitin	EM48	1C2
UBIQUITIN																										Ave	269899	67917.8	201010	402699	0	316529
TOTAL AFFECTED NEURONS IN OLD Q150													AVERAGE	STDEV	STANDARD EROR OF MEAN
8M	388853	361111	361957	252665	648908							8M	402699	147233	65844.6											sem	46801.7	22073.4	47904.3	65844.6	0	81570
18M	272719	519367	443325	460668	514397							18M	442095	100291	44851.5
Diffuse Staining
8M	0	0	0	0	0							8M	0	0	0
18M	0	0	0	0	0							18M	0	0	0
inclucions
8M	388853	361111	361957	252665	648908							8M	402699	147233	65844.6
18M	272719	519367	443325	460668	514397							18M	442095	100291	44851.5
EM48
TOTAL AFFECTED NEURONS IN OLD Q150													AVERAGE	STDEV	STANDARD EROR OF MEAN
8M	0	0	0	0	0							8M	0	0	0
18M	0	0	0	0	0							18M	0	0	0
Diffuse Staining																									18m	total affected neurones
8M	0	0	0	0	0							8M	0	0	0												S830-CA	S830	MW8	Ubiquitin	EM48	1C2
18M	0	0	0	0	0							18M	0	0	0											Ave	581021	521609	569580	442095	0	494420
																										sem	43156.1	77575.1	114339	44851.5	0	33892.2
inclucions
8M	0	0	0	0	0							8M	0	0	0
18M	0	0	0	0	0							18M	0	0	0
1C2
TOTAL AFFECTED NEURONSin old Q150													AVERAGE	STDEV	STANDARD EROR OF MEAN
8M	541321	332771	195909	196114								8M	316529	163140	81570
18M	425312	423221	543806	482627	597135							18M	494420	75785.4	33892.2
Diffuse Staining
8M	0	0	0	0								8M	0	0	0
18M	0	0	0	0	0							18M	0	0	0
inclucions
8M	541321	332771	195909	196114								8M	316529	163140	81570
18M	425312	423221	543806	482627	597135							18M	494420	75785.4	33892.2										18m	diffuse staining
																											S830-CA	S830	MW8	Ubiquitin	EM48	1C2
																										Ave	0	0	0	0	0	0
																										sem	0	0	0	0	0	0
																									18m	inclusions
																											S830-CA	S830	MW8	Ubiquitin	EM48	1C2
																										Ave	581021	521609	569580	442095	0	494420
																										sem	43156.1	77575.1	114339	44851.5	0	33892.2

## Sheet: NewcolQ150
B6 Hdh Q150				(NEW COLONY Q150
s830 with CA treatment																						8m	total affected neurones
nc-q150																								S830-CA	S830	MW8	Ubiquitin	EM48	1C2
	Total Neurones												AVERAGE	STDEV	STANDARD EROR OF MEAN								Ave	215212	21242.4	729092	460931	0	0
8 months	293296	105995	445229	153149	78391.4							8M	215212	152893	68375.9
18 months	481034	383129	453892	475010								18M	448266	44957.2	22478.6								sem	68375.9	3745.96	204290	69693.6	0	0
	Agg
8 months	129395	28907.6	185512	76574.6	41501.3							8M	92378.2	65021	29078.3
18 months	0	0	0	0								18M	0	0	0
	inc
8 months	163901	77086.9	259717	76574.6	36890							8M	122834	89502.2	40026.6
18 months	481034	383129	453892	475010								18M	448266	44957.2	22478.6
S830
TOTAL AFFECTED NEURONS in NEWCOL-Q150													AVERAGE	STDEV	STANDARD EROR OF MEAN
8M	35154.5	33177	16509.5	16201.2	23703.3	15700.7	8250.4					8M	21242.4	9910.88	3745.96
18M	42069	264901	398375	336570	157143	117572	58136.2	362552				18M	217165	141412	49996.6
Diffuse Staining
8M	7812.11	24882.7	4127.39	4050.31	15802.2	15700.7	8250.4					8M	11518	7629.59	2883.71							8m	Diffuse Staining
18M	0	0	0	0	0	0	0	0				18M	0	0	0									S830-CA	S830	MW8	Ubiquitin	EM48	1C2
																							Ave	92378.2	11518	0	54969.5	0	0
inclucions																							sem	29078.3	2883.71	0	15067.4	0	0
8M	27342.4	8294.25	12382.2	12150.9	7901.11	0	0					8M	9724.4	9290.16	3511.35
18M	42069	264901	398375	336570	157143	117572	58136.2	362552				18M	217165	141412	49996.6
MW8
TOTAL AFFECTED NEURONS NEW Q150													AVERAGE	STDEV	STANDARD EROR OF MEAN
8M	1.13666e+06	550238	500381									8M	729092	353841	204290
18M	551278	766939	783430	779223	504306	451518	630757					18M	638208	140203	52991.9
Diffuse Staining
8M	0	0	0									8M	0	0	0
18M	0	0	0	0	0	0	0					18M	0	0	0
inclucions
8M	1.13666e+06	550238	500381									8M	729092	353841	204290
18M	551278	766939	783430	779223	504306	451518	630757					18M	638208	140203	52991.9							8m	Inclusions
																								S830-CA	S830	MW8	Ubiquitin	EM48	1C2
																							Ave	122834	9724.4	729092	405961	0	0
																							sem	40026.6	3511.35	204290	80919	0	0
UBIQUITIN
TOTAL AFFECTED NEURONS IN NEW COLONY Q150													AVERAGE	STDEV	STANDARD EROR OF MEAN
8M	336337	573110	587581	556244	251381							8M	460931	155840	69693.6
18M	383548	194719	225276	646995	610645	264014						18M	387533	197928	80803.7
Diffuse Staining
8M	77616.2	55462.3	55085.8	0	86683							8M	54969.5	33691.7	15067.4
18M	0	0	0	0	0	0						18M	0	0	0
inclucions
8M	258721	517648	532496	556244	164698							8M	405961	180940	80919
18M	383548	194719	225276	646995	610645	264014						18M	387533	197928	80803.7
EM48
TOTAL AFFECTED NEURONS IN NEW COLONY Q150													AVERAGE	STDEV	STANDARD EROR OF MEAN
8M	0	0	0	0	0							8M	0	0	0							18m	total affected neurones
18M	0	0	0	0	0	0						18M	0	0	0									S830-CA	S830	MW8	Ubiquitin	EM48	1C2
																							Ave	448266	217165	638208	387533	0	190867
Diffuse Staining																							sem	22478.6	49996.6	52991.9	80803.7	0	18398.6
8M	0	0	0	0	0							8M	0	0	0
18M	0	0	0	0	0	0						18M	0	0	0
inclucions
8M	0	0	0	0	0							8M	0	0	0
18M	0	0	0	0	0	0						18M	0	0	0
1C2
TOTAL AFFECTED NEURONSin NEW colony Q150													AVERAGE	STDEV	STANDARD EROR OF MEAN
8M	0	0	0	0	0							8M	0	0	0
18M	177684	177487	188394	150659	260110							18M	190867	41140.5	18398.6
Diffuse Staining
8M	0	0	0	0	0							8M	0	0	0
18M	0	0	0	0	0							18M	0	0	0
																						18m	Diffuse Staining
																								S830-CA	S830	MW8	Ubiquitin	EM48	1C2
inclucions																							Ave	0	0	0	0	0	0
8M	0	0	0	0	0							8M	0	0	0
18M	177684	177487	188394	150659	260110							18M	190867	41140.5	18398.6								sem	0	0	0	0	0	0
																						18m	Inclusions
																								S830-CA	S830	MW8	Ubiquitin	EM48	1C2
																							Ave	448266	217165	638208	387533	0	190867
																							sem	22478.6	49996.6	52991.9	80803.7	0	18398.6
